# Supplementary material for: Large-Scale Wearable Sensor Deployment in Parkinson’s Patients: The Parkinson@Home Study Protocol
Source: PubMed Central journal article supplement (PMC5018102; doi:10.2196/resprot.5990), 2016-08-26
Supplement: resprot_v5i3e172_app2.pdf [file resprot_v5i3e172_app2.pdf]

Multimedia Appendix 2. Parkinson@Home study data.

| <b>Study Instrument</b>                                  | <b>Outcome measure</b>                                       | <b>Type</b>             | <b>Frequency</b>     |
|----------------------------------------------------------|--------------------------------------------------------------|-------------------------|----------------------|
| Demographic profile                                      | Age at disease onset                                         | Patient self-report     | Once                 |
|                                                          | Ethnicity                                                    | Patient self- report    | Once                 |
|                                                          | Level of education                                           | Patient self- report    | Once                 |
|                                                          | Time since diagnoses                                         | Patient self - report   | Once                 |
| PPMI: MDS-UPDRS [8]                                      | Non-motor experiences of daily living                        | Physiotherapist report  | Once                 |
|                                                          | Motor experiences of daily living                            | Physiotherapist report  | Once                 |
|                                                          | Motor examination                                            | Physiotherapist report  | Once                 |
|                                                          | Motor complications                                          | Physiotherapist report  | Once                 |
| PPMI: Epworth sleepiness scale [29]                      | Sleep quality                                                | Patient self-report     | Once                 |
| PPMI: Geriatric Depression Scale [28]                    | Depressive behavior                                          | Patient self-report     | Once                 |
| PPMI: MoCA [25]                                          | Cognitive impairment                                         | Physiotherapist report  | Once                 |
| PPMI: Schwab and England activities of daily living [26] | Functional level at activities of daily living               | Physiotherapist report  | Once                 |
| PPMI: SCOPA-AUT [27]                                     | Autonomic dysfunctions                                       | Patient self-report     | Once                 |
| Fox Insight app                                          | Medication intake (compliance)                               | Patient self-report     | Multiple time points |
|                                                          | Falls                                                        | Patient self-report     | Multiple time points |
|                                                          | Percentage of sensor data streaming in 3 months (compliance) | Processed Accelerometer | Multiple time points |
| Smartwatch (Pebble)                                      | Time that the patient is active during the day               | Processed Accelerometer | 0.2Hz                |
|                                                          | Level of physical activity during the day                    | Processed Accelerometer | 0.2 Hz               |

| <b>Study Instrument</b>     | <b>Outcome measure</b>                                                                 | <b>Type</b>                   | <b>Frequency</b>                                |
|-----------------------------|----------------------------------------------------------------------------------------|-------------------------------|-------------------------------------------------|
|                             | Hours during the day where the patient had tremor                                      | Processed Accelerometer       | 0.03 Hz                                         |
|                             | Amount of movements during sleep time                                                  | Processed Accelerometer       | 0.003 Hz                                        |
|                             | Raw sensor data                                                                        | Raw accelerometer             | 50 Hz                                           |
| PMM/FD                      | Number of fall events                                                                  | Processed Accelerometer       | Depending on the number of detected fall events |
| Zendesk                     | Time spent providing troubleshooting telephone support per patient (feasibility)       | Study support team indicators | Multiple time points                            |
|                             | Inclusion rate (feasibility)                                                           | Study support team indicators | Once                                            |
|                             | Drop-out rate (feasibility)                                                            | Study support team indicators | Once                                            |
|                             | Type of technical and/or study procedure problem encountered by patients (feasibility) | Patient self-report           | N/A                                             |
|                             | Patients' socioeconomic status (SES; possible biases in the population)                | Patient self-report           | Once                                            |
| System Usability Scale [28] | Usability and learnability of the Fox Insight app                                      | Patient self-report           | Once                                            |
| Satisfaction survey         | User's satisfaction with the system (smartwatch and app)                               | Patient self-report           | Once                                            |
|                             | Patients' sociodemographic details (e.g. gender, disease duration, age and previous    | Patient self-report           | Once                                            |

| Study Instrument | Outcome measure                                                 | Type | Frequency |
|------------------|-----------------------------------------------------------------|------|-----------|
|                  | experience with smartphones; possible biases in the population) |      |           |

PPMI - Parkinson Progression Marker Initiative; MDS-UPDRS - Movement Disorder Society - Unified Parkinson's Disease Rating

Scale; MoCA - Montreal Cognitive Assessment for cognition; SCOPA-AUT- Scales for Outcomes in Parkinson's Disease –

Autonomic System for autonomic dysfunction
